# Supplementary material
Source: PubMed Central journal article supplement (PMC1626136)
Supplement: JCI0628721sd.pdf [file JCI0628721sd.pdf]

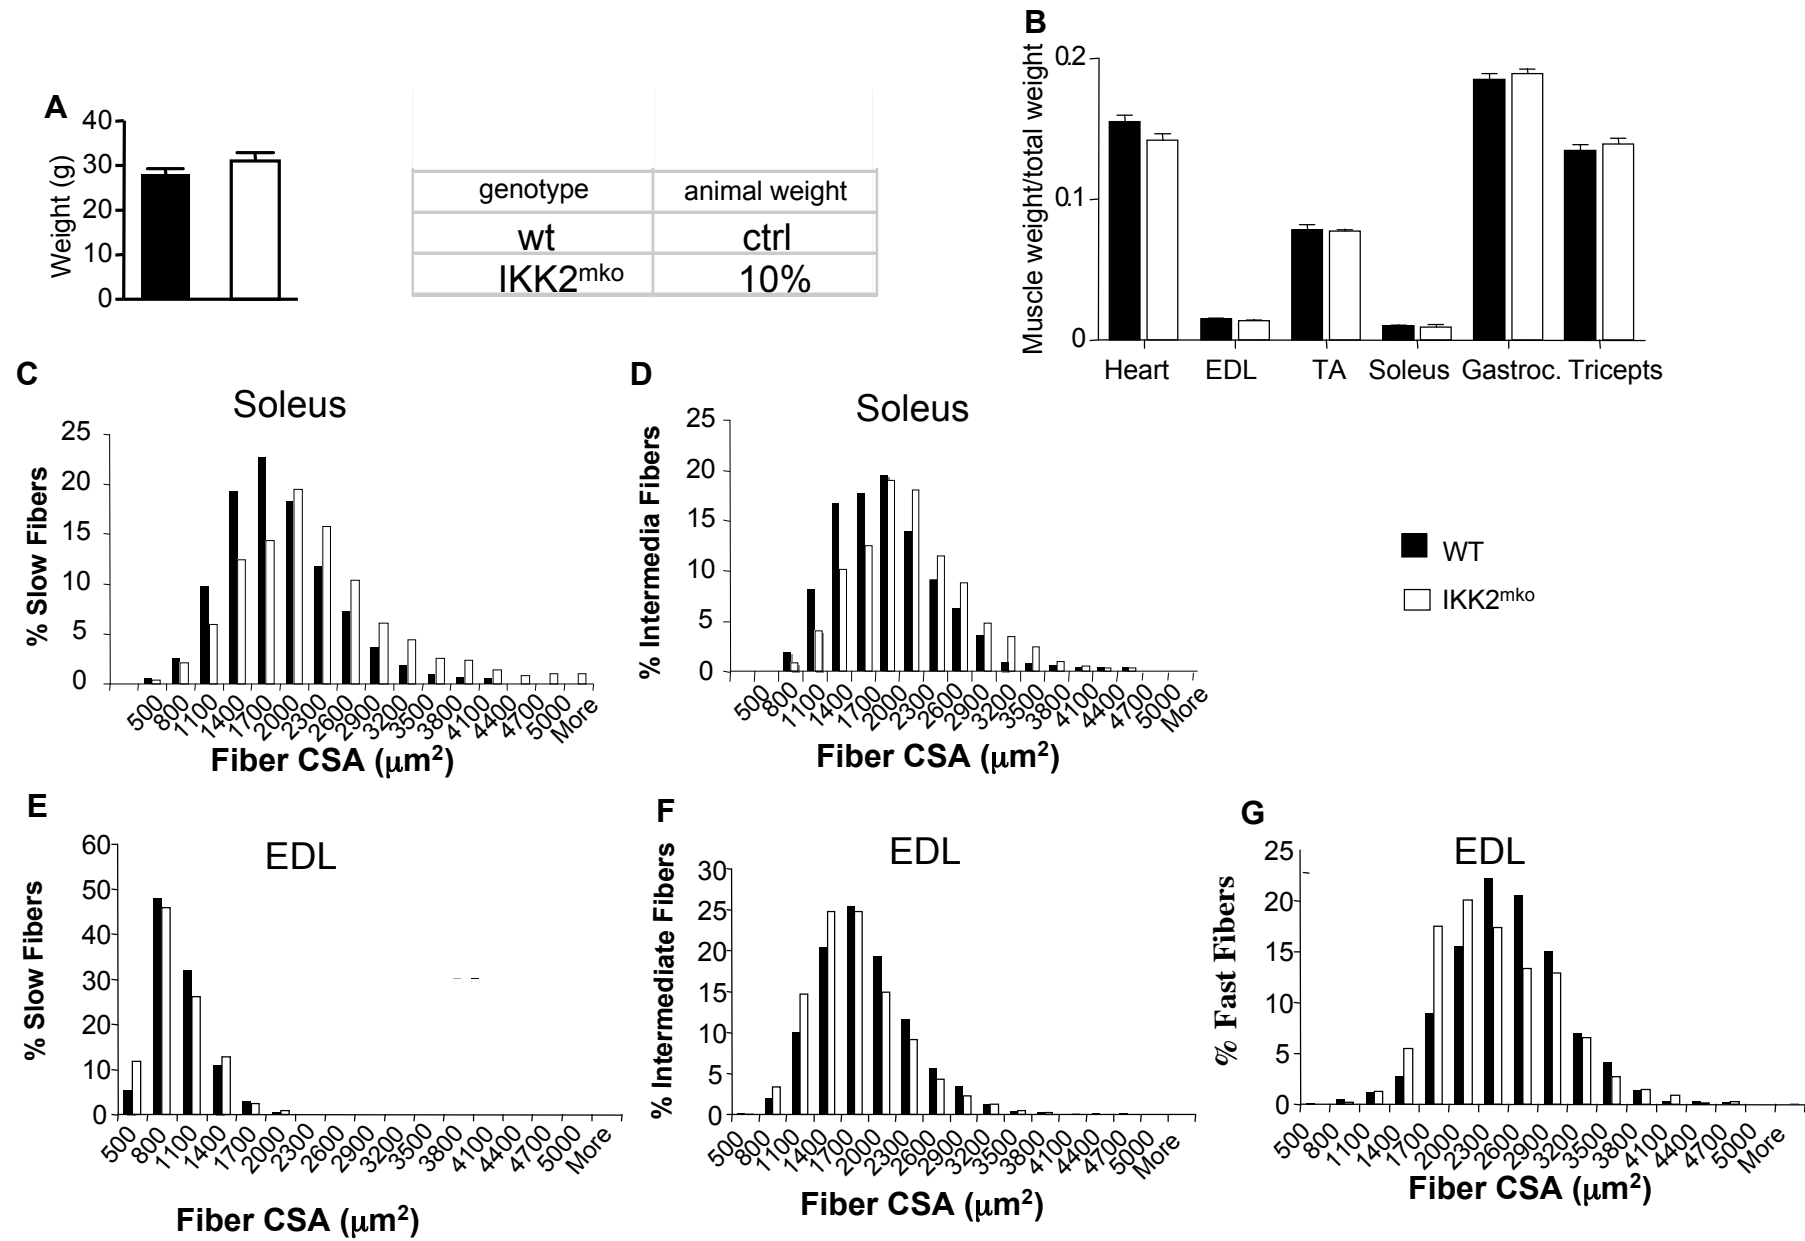

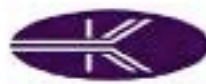

## KINEXUS

### KINETWORKS™ NORMALIZATION COMPARISON REPORT

| Normalized Data Comparison<br>Of Normalized Counts per Minute |              |           |                   |                       |                                |
|---------------------------------------------------------------|--------------|-----------|-------------------|-----------------------|--------------------------------|
| FULL NAME OF PROTEIN                                          | ABBREVIATION | EPI TOPE  | WT DN             | IKK2 <sup>dn</sup> DN | % IKK2 <sup>dn</sup> DN/ WT DN |
|                                                               |              |           | NORMALIZED C.P.M. |                       |                                |
| 90 kDa Ribosomal S6 Kinases (S380)                            | RSK1/2       | S380      | 294               | 459                   | 56%                            |
| 90 kDa Ribosomal S6 Kinases (T573)                            | RSK1/2       | T573      |                   |                       |                                |
| AMP-activated protein kinase alpha (T172)                     | AMPKa        | T172      |                   |                       |                                |
| Bone marrow X (Eph-like) kinase (Y40)                         | BMX (Etk)    | Y40       |                   |                       |                                |
| Bruton's tyrosine kinase (Y223)                               | Btk          | Y223      |                   |                       |                                |
| Calcium/calmodulin-dependent kinase II (T286)                 | CaMK2        | T286      |                   |                       |                                |
| Cyclin-dependent kinase I (T161)                              | CDK1         | T161      |                   |                       |                                |
| Cyclin-dependent kinase I (Y15)                               | CDK1         | Y15       |                   |                       |                                |
| eIF4E binding protein (S65) (16)                              | 4E-BP1       | S65       |                   |                       |                                |
| eIF4E binding protein (S65) (17)                              | 4E-BP1       | S65       |                   |                       |                                |
| eIF4E binding protein (S65) (18)                              | 4E-BP1       | S65       |                   |                       |                                |
| Extracellular signal-regulated kinase 1 (T202/Y204)           | ERK1         | T202/Y204 | 446               | 226                   | -49%                           |
| Extracellular signal-regulated kinase 2 (T185/Y187)           | ERK2         | T185/Y187 | 749               | 176                   | -77%                           |
| Glycogen synthase kinase-3 alpha (S21)                        | GSK3a        | S21       | 102               | 206                   | 102%                           |
| Glycogen synthase kinase-3 beta (S9)                          | GSK3b        | S9        | 38                | 48                    | 26%                            |
| I-kappa-B kinase alpha (S180)                                 | IKKa         | S181      |                   |                       |                                |
| I-kappa-B kinase beta (S181)                                  | IKKb         | S180      |                   |                       |                                |
| Lyn (Y507) (44)                                               | Lyn          | Y507      | 527               | 509                   | -3%                            |
| Lyn (Y507) (46)                                               | Lyn          | Y507      | 234               | 172                   | -26%                           |
| MAP kinase activated protein kinase 2 (T334)                  | MAPKAPK2     | T334      |                   |                       |                                |
| MAP kinase interacting kinase 1 (T197/202)                    | Mnk1         | T197/202  | 389               | 538                   | 38%                            |
| MAPK/Erk kinase 1/2 (S217/221)                                | MEK1/2       | S217/221  | 114               | 68                    | -40%                           |
| MKK3/6(1) (S189/S207)                                         | MKK3/6       | S189/S207 |                   |                       |                                |
| MKK6(2) (S207)                                                | MKK6         | S207      | 261               | 239                   | -8%                            |
| p38 MAPK (T180/Y182)                                          | p38a MAPK    | T180/Y182 |                   |                       |                                |
| p70 S6 kinase (T389)                                          | S6Ka p70     | T389      |                   |                       |                                |
| p70 S6 kinase (T421/T424)                                     | S6Ka p70     | T421/T424 | 178               | 366                   | 106%                           |
| p85 S6 kinase 2 (T412)                                        | S6K2 p85     | T412      |                   |                       |                                |
| p85 S6 kinase 2 (T444/S447)                                   | S6K2 p85     | T444/S447 |                   |                       |                                |
| Phosphoinositide-dependent protein kinase 1 (S241)            | PDK1         | S241      | 426               | 475                   | 12%                            |
| PKC-related kinase 1 (T778)                                   | PRK1         | T778      | 238               | 255                   | 7%                             |
| PKC-related kinase 2 (T816)                                   | PRK2         | T816      |                   |                       |                                |
| Protein kinase B (T308)                                       | PKBa (Akt1)  | T308      |                   |                       |                                |
| Protein kinase C alpha/beta (T638)                            | PKCa/b       | T638      | 1126              | 399                   | -65%                           |
| Protein kinase C delta (T505)                                 | PKCd         | T505      | 124               | 87                    | -30%                           |
| Protein kinase C zeta (T410)/lambda (T403)                    | PKCz/l       | T410/403  | 132               | 88                    | -33%                           |
| Protein kinase D (Protein kinase mu) (S916)                   | PKCm/PKD     | S916      | 62                | 71                    | 15%                            |
| Protein kinase theta (T538)                                   | PKCt         | T538      | 1075              | 1145                  | 7%                             |
| Raf (S259) (60)                                               | Raf1         | S259      | 1354              | 1760                  | 30%                            |
| Raf (S259) (70)                                               | Raf1         | S259      | 358               | 170                   | -53%                           |
| Retinoblastoma Protein (S780)                                 | Rb           | S780      | 125               | 115                   | -8%                            |
| Retinoblastoma Protein (S807/S811)                            | Rb           | S807/S811 |                   |                       |                                |
| The mammalian target of Rapamycin (S2448)                     | mTOR         | S2448     | 101               | 480                   | 375%                           |
| Type I protein phosphatase alpha (T320)                       | PP1a         | T320      |                   |                       |                                |
| Zap70 (Y319)/Syk (Y352)                                       | Zap70/Syk    | Y319/Y352 |                   |                       |                                |

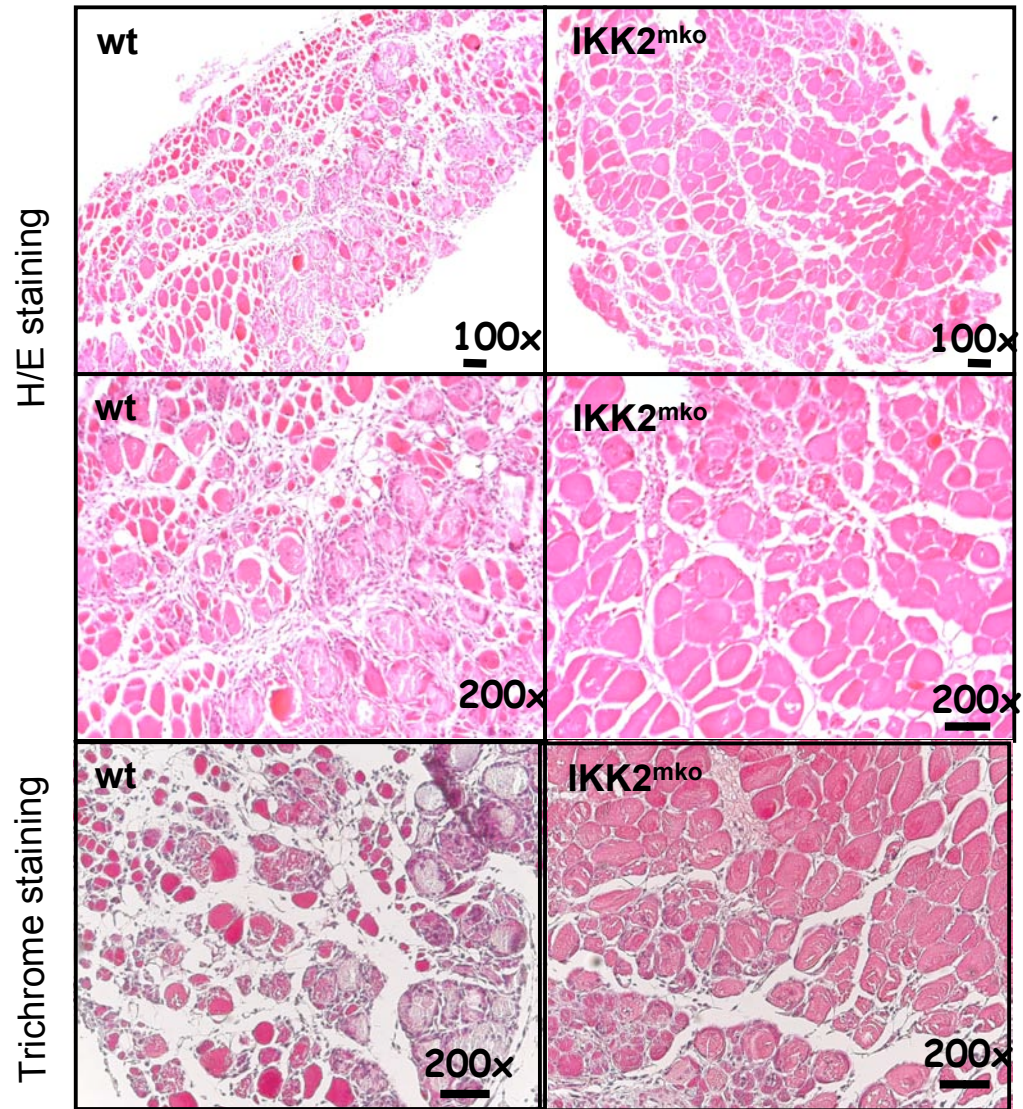

**Supplementary Figure 1.** Comparative analysis of control and IKK2<sup>mk0</sup> animals (A) Body weight of wild type (filled bar) and IKK2<sup>mk0</sup> (open bar) mice (n=8 and n= 7, respectively). IKK2<sup>mk0</sup> mice had 10% body weight than controls. (B) Skeletal muscles (WT n=5 and IKK2<sup>mk0</sup> n=5) were dissected, weighed and normalized to total muscle weight for comparison among different animals. Muscles of IKK2<sup>mk0</sup> and control mice had similar weight muscles from controls. EDL=extensor digitorum longus, TA=tibialis anterior, gastroc=gastrocnemius, triceps=triceps brachii. (C-G) CSA measurements in control and IKK2<sup>mk0</sup> soleus (C-D) and EDL (E-G) show similar fast, intermediate and slow fibre sizes.

**Supplementary Figure 2. Kinetworks protein profiling of control and IKK2<sup>mk0</sup> gastrocnemius muscles 28 days after denervation.** Proteins with enhanced or reduced phosphorylation are listed. Note that the blank boxes represent proteins that have been tested but didn't show any change.

**Supplementary Figure 3. IKK2 depletion improves regeneration even at high doses of CTX injection.** Note increased fibrotic tissue (blue trichrome staining) in control compared to IKK2<sup>mk0</sup> injured muscles.
